# Supplementary material
Source: Springer Nature journal article supplement (https://www.springermedizin.de/resource/supplementary/12943_2008_409_MOESM10_ESM.pdf/9554200)

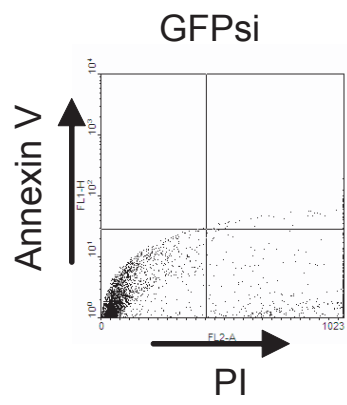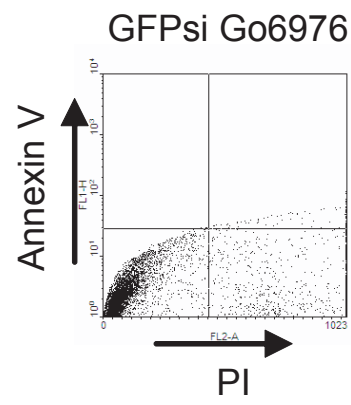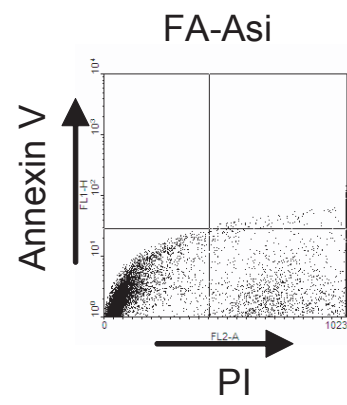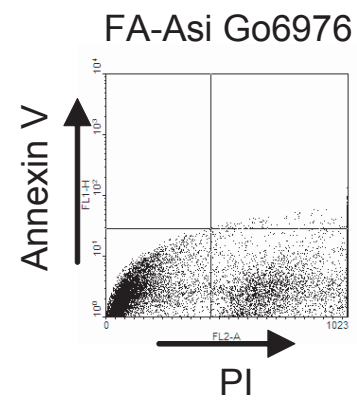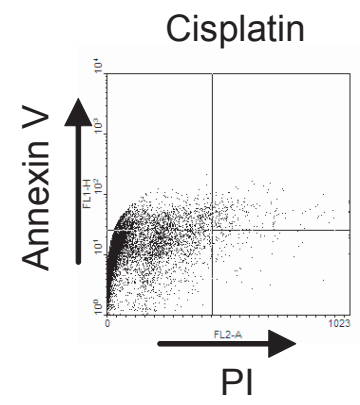

Supplement: MOESM10 [file 9554200]
